# Supplementary material for: Seipin concentrates distinct neutral lipids via interactions with their acyl chain carboxyl esters
Source: PubMed Central journal article supplement (PMC9365673; doi:10.1083/jcb.202112068), 2022-08-08
Supplement: JCB_202112068_SourceDataFS1.pdf [file JCB_202112068_SourceDataFS1.pdf]

IB: Pln1

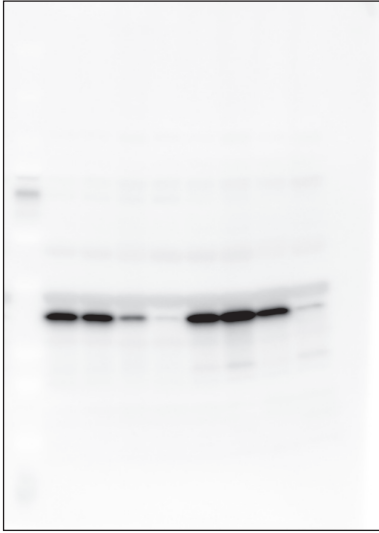

Marker (epi)

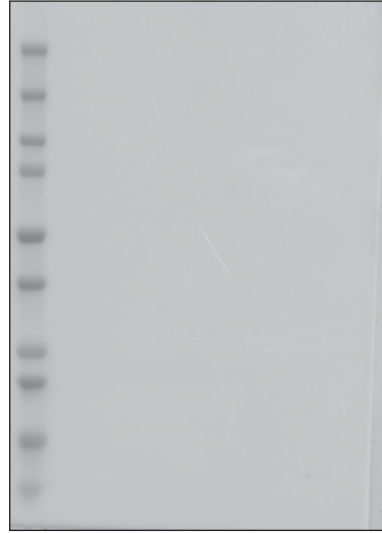

50

IB: Dpm1

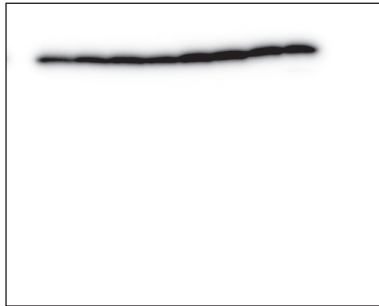

Marker (epi)

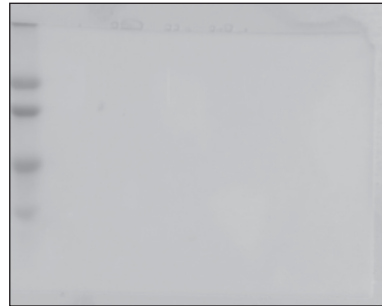

37

25
