# Supplementary material for: Seipin concentrates distinct neutral lipids via interactions with their acyl chain carboxyl esters
Source: PubMed Central journal article supplement (PMC9365673; doi:10.1083/jcb.202112068), 2022-08-08
Supplement: JCB_202112068_SourceDataFS4.pdf [file JCB_202112068_SourceDataFS4.pdf]

IB: FLAG

Marker (epi)

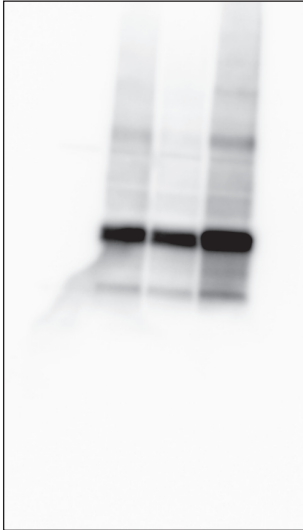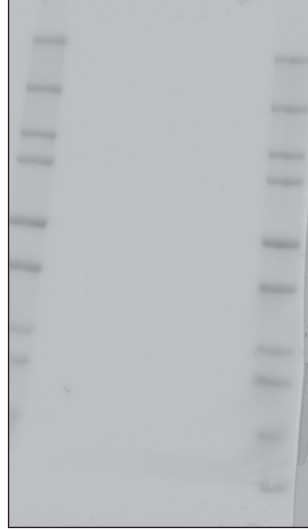

50  
37  
25

IB: Dpm1

Marker (epi)

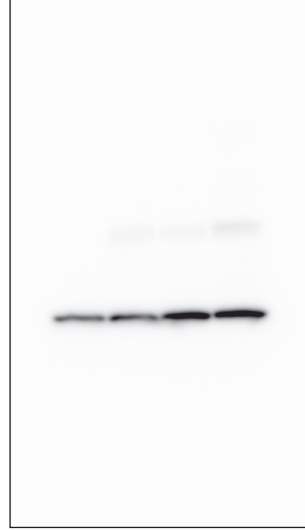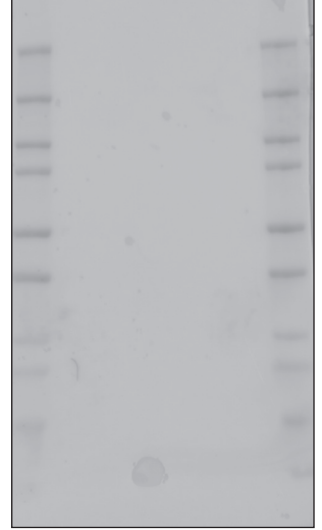

50  
37  
25
